# Supplementary material
Source: PubMed Central journal article supplement (PMC2681668)
Supplement: supp_75_9_2869__1.pdf [file supp_75_9_2869__1.pdf]

1 **SUPPLEMENTARY DATA**

2  
3 **Biosynthesis of Sibiromycin, a potent antitumor antibiotic<sup>†</sup>**

4 *Wei Li, Ankush Khullar, ShenChieh Chou, Ashley Sacramo<sup>1</sup> and Barbara*

5 *Gerratana\**

6 *Department of Chemistry and Biochemistry, University of Maryland, College Park,*

7 *MD 20742 USA*

8  
9 Current address: <sup>1</sup>Department of Biochemistry, University of Wisconsin, Madison,

10 WI 53706 USA

11 **\*Corresponding author.** Mailing address: Dr. Barbara Gerratana, Department of

12 Chemistry and Biochemistry, Bldg 091, University of Maryland, MD 20742.

13 Phone: (301) 405-1541. Fax: (301) E-m 314-9121. E-mail: bgerrata@umd.edu

14

15

16

17

18

**Table S1. Strains and plasmids used in this study.**

| Strain & vector                   | Genotype comment                                                                                                                                                                                                                             | Source or reference                       |
|-----------------------------------|----------------------------------------------------------------------------------------------------------------------------------------------------------------------------------------------------------------------------------------------|-------------------------------------------|
| <i>Bacillus subtilis</i>          | antibiotic test strain                                                                                                                                                                                                                       | NRRL354                                   |
| <b>E coli strains</b>             |                                                                                                                                                                                                                                              |                                           |
| GeneHogs                          | F <sub>-</sub> <i>mcrA</i> <sub>-</sub> ( <i>mrr-hsdRMS-mcrBC</i> ) 80 <i>dlacZ</i> <sub>-</sub> M15/ <i>araD139</i> <sub>-</sub> ( <i>ara-leu</i> )7697 <sub>-</sub> <i>lacX74 galU galK rpsL deoR endA1 nupG recA1 trfA Ampr fhuA::IS2</i> | Invitrogen                                |
| XL-1 Blue MR.                     | ( <i>mcrA</i> )183 .( <i>mcrCB-hsdSMR-mrr</i> )173 <i>endA1 supE44 thi-1 recA1 gyrA96 relA1 lac</i> .                                                                                                                                        | Stratagene                                |
| ET12567                           | ( <i>dam</i> <sup>-</sup> <i>dcm</i> - <i>hsdM</i> -), Tet <sup>R</sup> , Cm <sup>R</sup>                                                                                                                                                    | Dr. B. Gust (University of Tübingen) (27) |
| <b>Streptosporangium strains</b>  |                                                                                                                                                                                                                                              |                                           |
| <i>S. sibiricum</i>               | wild-type strain, sibiromycin producer                                                                                                                                                                                                       | DSM 44093                                 |
| <i>S. sibiricum</i> Δ <i>X1</i>   | <i>orfX1</i> -disrupted mutant of <i>S. sibiricum</i>                                                                                                                                                                                        | This study                                |
| <i>S. sibiricum</i> Δ <i>X2</i>   | <i>orfX2</i> -disrupted mutant of <i>S. sibiricum</i>                                                                                                                                                                                        | This study                                |
| <i>S. sibiricum</i> Δ <i>X3</i>   | <i>orfX3</i> -disrupted mutant of <i>S. sibiricum</i>                                                                                                                                                                                        | This study                                |
| <i>S. sibiricum</i> Δ <i>sibA</i> | <i>sibA</i> -disrupted mutant of <i>S. sibiricum</i>                                                                                                                                                                                         | This study                                |
| <i>S. sibiricum</i> Δ <i>sibC</i> | <i>sibC</i> -disrupted mutant of <i>S. sibiricum</i>                                                                                                                                                                                         | This study                                |
| <i>S. sibiricum</i> Δ <i>sibE</i> | <i>sibE</i> -disrupted mutant of <i>S. sibiricum</i>                                                                                                                                                                                         | This study                                |
| <i>S. sibiricum</i> Δ <i>sibG</i> | <i>sibG</i> -disrupted mutant of <i>S. sibiricum</i>                                                                                                                                                                                         | This study                                |
| <b>Plasmids</b>                   |                                                                                                                                                                                                                                              |                                           |
| SuperCos1                         | Cosmid cloning vector; <i>bla</i> , <i>neo</i> , <i>cos</i>                                                                                                                                                                                  | Stratagene                                |
| pUZ8002                           | non-transmissible helper plasmid; <i>tra</i> , <i>neo</i> RP4                                                                                                                                                                                | Dr. B. Gust (University of Tübingen) (19) |
| pGEM-T easy                       | <i>E. coli</i> subcloning vector                                                                                                                                                                                                             | Promega                                   |
| pIJ790                            | λ-RED ( <i>gam</i> , <i>bet</i> , <i>exo</i> ), <i>cat</i> , <i>araC</i> , <i>rep101</i> <sup>ts</sup>                                                                                                                                       | Dr. B. Gust (University of Tübingen) (8)  |
| pIJ773                            | <i>aac(3)IV</i> (Apr <sup>R</sup> ) <sub>-</sub> <i>oriT</i>                                                                                                                                                                                 | Dr. B. Gust (University of Tübingen) (8)  |
| pT-Glu                            | 541bp PCR product of the dTDP-glucose 4,6 dehydratase gene in pGEM-T Easy                                                                                                                                                                    | This study                                |
| pT-A3A7                           | 724 bp PCR product of the NRPS adenylation domain in                                                                                                                                                                                         | This study                                |

|                         | pGEM-T Easy                                                                                                                                   |            |
|-------------------------|-----------------------------------------------------------------------------------------------------------------------------------------------|------------|
| pT-S2                   | 455 bp PCR product of probe S2 in pGEM-T Easy                                                                                                 | This study |
| pSuperSib1              | Cosmid clone from <i>S. sibiricum</i> DSM 44093 genomic library, 38.7-kb chromosomal fragment in SuperCos1; Ap <sup>R</sup> , Km <sup>R</sup> | This study |
| pSuperSib2              | Cosmid clone from <i>S. sibiricum</i> DSM 44093 genomic library, 45-kb chromosomal fragment in SuperCos1; Ap <sup>R</sup> , Km <sup>R</sup>   | This study |
| pSuperSib1Δ <i>X1</i>   | <i>orfX1</i> replaced with pIJ773 Apr <sup>R</sup> - <i>oriT</i> cassette in pSuperSib1                                                       | This study |
| pSuperSib1Δ <i>X2</i>   | <i>orfX2</i> replaced with pIJ773 Apr <sup>R</sup> - <i>oriT</i> cassette in pSuperSib1                                                       | This study |
| pSuperSib1Δ <i>X3</i>   | <i>orfX3</i> replaced with pIJ773 Apr <sup>R</sup> - <i>oriT</i> cassette in pSuperSib2                                                       | This study |
| pSuperSib1Δ <i>sibA</i> | <i>sibA</i> gene replaced with pIJ773 Apr <sup>R</sup> - <i>oriT</i> cassette in pSuperSib1                                                   | This study |
| pSuperSib1Δ <i>sibC</i> | <i>sibC</i> gene replaced with pIJ773 Apr <sup>R</sup> - <i>oriT</i> cassette in pSuperSib1                                                   | This study |
| pSuperSib1Δ <i>sibE</i> | <i>sibE</i> gene replaced with pIJ773 Apr <sup>R</sup> - <i>oriT</i> cassette in pSuperSib1                                                   | This study |
| pSuperSib1Δ <i>sibG</i> | <i>sibG</i> gene replaced with pIJ773 Apr <sup>R</sup> - <i>oriT</i> cassette in pSuperSib1                                                   | This study |
| pSuperSib1Δ <i>CTRL</i> | <i>bla</i> gene on SuperCos1 replaced with pIJ773 Apr <sup>R</sup> - <i>oriT</i> cassette in pSuperSib1                                       | This study |

19

**Table S2. Oligonucleotides PCR primers used in this study.**

| Primer                                   | Sequence (5'—3')                                                      |
|------------------------------------------|-----------------------------------------------------------------------|
| <b>For library screening</b>             |                                                                       |
| Glu1                                     | CSGGSGSSGCSGGSTTCATSGG                                                |
| Glu2                                     | GGGWRCTGGYRSGGSCCGTAGTTG                                              |
| A3                                       | GCSTACSYSATSTACACSTCSGG                                               |
| A7R                                      | SASGTCVCCSGTSCGGTAS                                                   |
| S2_F                                     | CGGGACGGTGTTGTTTCG                                                    |
| S2_R                                     | GTGGTCAGCTACCTGATG                                                    |
| <b>For gene inactivation<sup>a</sup></b> |                                                                       |
| <i>orfX1_F</i>                           | <u>AACCCGCCACCACCCTTCACCGAAGAGGAGACGCCATGCCTAGGgggatccgtcgac</u><br>c |

|                |                                                              |
|----------------|--------------------------------------------------------------|
| <i>orfX1_R</i> | CCACGATCGTCGGCGAGGCGGGAGACATGCCGGCCCTCACTAGTggctggagctgcttc  |
| <i>orfX2_F</i> | GCCGCCCCGACGACGGCGGCCACCGGAAAGGACAAGGATGCCTAGGgggatccgtcgacc |
| <i>orfX2_R</i> | GGCGTCTCCTCTTCGGTGAAGGGTGGTGGGCGGGTTTCACTAGTggctggagctgcttc  |
| <i>orfX3_F</i> | GGGGCCGCGACGAATCGACCCGCCAGGAAGAAGCGAATGCCTAGGgggatccgtcgacc  |
| <i>orfX3_R</i> | ACCGCTTCCGTGGACGCCACCGCTTCCGGGGACGCCTCACTAGTggctggagctgcttc  |
| <i>sibA_F</i>  | AGACGATCCGGAGATCCATTGACATGGGGGTAATGAATGCCTAGGgggatccgtcgacc  |
| <i>sibA_R</i>  | TCCCCGGACGGTCTTCGCCTTTCGTAAGGACATCGTCACTAGTggctggagctgcttc   |
| <i>sibC_F</i>  | TACCTCGGCGCCATGACCTCAGGAAGGGCTCCCTCCATGATTCCGgggatccgtcgacc  |
| <i>sibC_R</i>  | GAGGGTCCACGGTGACCTCGTACGGGGTGTCCGGACATCATGTAaggctggagctgcttc |
| <i>sibE_F</i>  | TCCGCCCTTCCCTCTCTCCGAGTCCCCACCCTTCCGGTGTCTAGAgggatccgtcgacc  |
| <i>sibE_R</i>  | GCCAGCGGTCGCGGACCACAGTGAGCAGCACGTCGCTCAACTAGTctggagctgcttc   |
| <i>sibG_F</i>  | GATCAACCGGATCAGCCAGTTGATCCAGGACAGTCGATGTCTAGAgggatccgtcgacc  |
| <i>sibG_R</i>  | TCCTCCCAATCATGTTGCTGTTCGATCGATGTGCGTTCAACTAGTggctggagctgcttc |
| Control-F      | AATCTAAAGTATATATGAGTAAACTTGGTCTGACAGTTAgttaggctggagctgcttc   |
| Control-R      | TGATAAATGCTTCAATAATATTGAAAAAGGAAGAGTATGattccggggatccgtcgacc  |

---

**For gene disruption confirm**

---

|                  |                          |
|------------------|--------------------------|
| <i>orfX2_C_F</i> | CGGAAAGGACAAGGATG        |
| <i>orfX2_C_R</i> | GTGGTGGGCGGGTTTC         |
| <i>orfX3_C_F</i> | GCCAGGAAGAAGCGAATG       |
| <i>orfX3_C_R</i> | CCGAGGTTGTGCTTCTAC       |
| <i>sibA_C_F</i>  | CATGGGGGTAATGAATG        |
| <i>sibA_C_R</i>  | CCGTAAGGACATCGTC         |
| <i>sibC_C_F</i>  | GAAAGGCGAAGACCGTCC       |
| <i>sibC_C_R</i>  | CGCTGGGGCTCGAGATTC       |
| <i>sibE_C_F</i>  | GGTGGTGAATTCCCCACCCTTCCG |

*sibE\_C\_R* GGTGGTGGATCCACGCCCGAGGATG

*sibG\_C\_F* TGCCTTTGAGGTTGTTGG

*sibG\_C\_R* TTCCCCAGGTGACGCT

<sup>a</sup>Homologous region of the apramycin cassette are in lowercase.

20

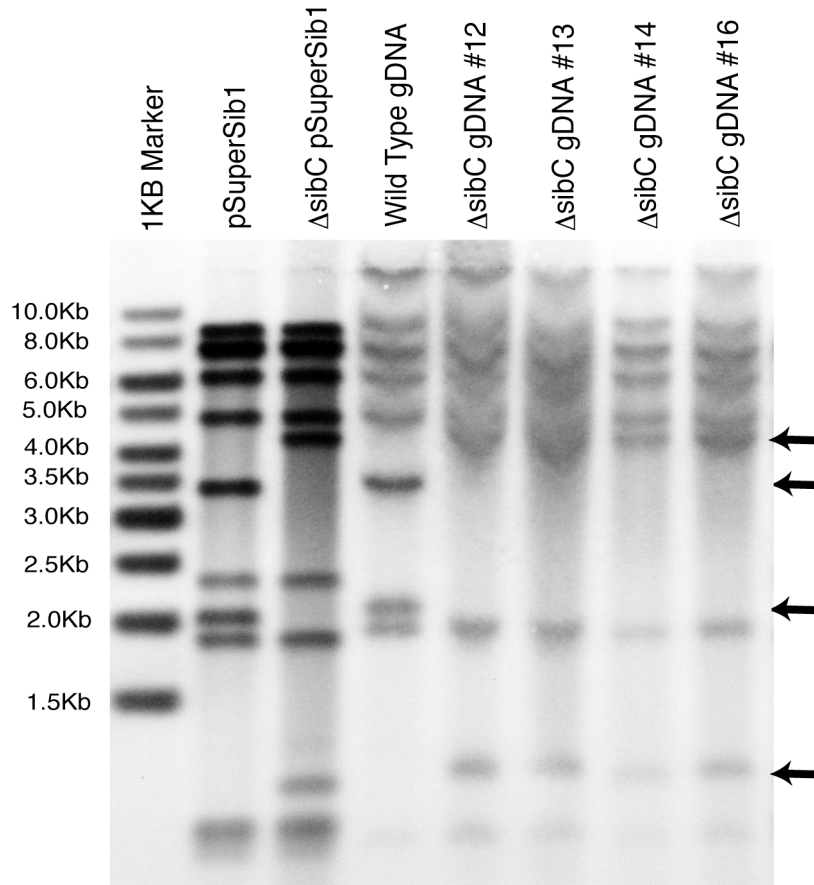

21

22 **Fig. S1** Southern blot analysis of genomic and cosmid DNA of wild-type and  $\Delta$ sibC strains.

23 Digestion with Pst1 of wild-type DNA yields two fragments of 3.3 and 2 Kb. The absence of

24 these fragments and the presence of two fragments new at 4.3 and 1 Kb in  $\Delta$ sibC strain are

25 consistent with a successful gene replacement.
